# Supplementary material for: Adherence to Vaccines in Adult Patients with Immune-Mediated Inflammatory Diseases: A Two-Year Prospective Portuguese Cohort Study
Source: MDPI journal article supplement (doi:10.3390/vaccines11030703), 2023-03-20
Supplement: s1 [file s1]

Supplementary Table S1 - Quality appraisal using CASP checklist for cohort studies

| CASP cohort study checklist                                                       | Answer     |
|-----------------------------------------------------------------------------------|------------|
| Did the study address a clearly focused issue?                                    | Yes        |
| Did the study address a clearly focused issue?                                    | Yes        |
| Was the cohort recruited in an acceptable way?                                    | Yes        |
| Was the exposure accurately measured to minimise bias?                            | Yes        |
| Was the outcome accurately measured to minimise bias?                             | Yes        |
| Have the authors identified all important confounding factors?                    | Yes        |
| Have they taken account of the confounding factors in the design and/or analysis? | Yes        |
| Was the follow up of subjects complete enough?                                    | Yes        |
| How precise are the results?                                                      | Can't tell |
| Do you believe the results?                                                       | Yes        |
| Can the results be applied to the local population?                               | Yes        |
| Do the results of this study fit with other available evidence?                   | Can't tell |
| Does the study have implications for practice?                                    | Yes        |
